# Supplementary material for: Additive-induced intermolecular interaction enhancement enables highly efficient organic solar cells
Source: Royal Society of Chemistry journal article supplement (doi:10.1039/d4tc03277b), 2024-01-01
Supplement: d4tc03277b1.pdf [file d4tc03277b1.pdf]

**Additive-induced intermolecular interaction enhancement enable highly efficient organic solar cells**

Chen Chen<sup>ab</sup>, Dingqin Hu<sup>\*bc</sup>, Peihao Huang<sup>b</sup>, Chun Hong MAK<sup>c</sup>, Heng Liu<sup>d</sup>, Hongliang Lei<sup>b</sup>, Xue Jiang<sup>a</sup>, Yulu Li<sup>b</sup>, Fengyi Yu<sup>b</sup>, Kaihuai Tu<sup>a</sup>, Hsien-Yi Hsu<sup>c</sup>, Xinhui Lu<sup>d</sup>, Haiyan Chen<sup>\*b</sup>, Zeyun Xiao<sup>b</sup>

<sup>a</sup> Chongqing Jiaotong University, Chongqing 400074, P. R. China

<sup>b</sup> Chongqing Institute of Green and Intelligent Technology, Chinese Academy of Sciences, Chongqing, 400714, P. R. China. E-mail: dingqihu@cityu.edu.hk; chenhaiyan@cigit.ac.cn

<sup>c</sup> School of Energy and Environment, Department of Materials Science and Engineering, City University of Hong Kong, Kowloon Tong, Hong Kong 999077, P. R. China

<sup>d</sup> Department of Physics, The Chinese University of Hong Kong, New Territories, Hong Kong 999077, P. R. China

## **Experimental Section**

### **1. Materials**

All reagents and solvents, unless otherwise specified, were purchased from Energy Chemical, Tansoole, Suna Tech, Aldrich, and JiangSu GE-Chem Biotech., Ltd. and were used without further purification. All materials are provided by commercial suppliers: PM6, Y6, eC9, PNDIT-F3N, PFN-Br was purchased from Solarmer Energy Inc. CB and CB was purchased from Macklin. PEDOT:PSS (Clevios P VP AI. 4083) was purchased from Heraeus.

### **2. Device Fabrication and characterizations**

The device structures were ITO / PEDOT: PSS / Active layer / PFN-Br / Ag. ITO-coated glass substrates underwent a sequential ultrasonic bath cleansing with detergent water, deionized water, acetone, and isopropyl alcohol, each for a duration of 15 minutes. Following the drying process with high-pressure nitrogen, the glass sheet underwent UV irradiation in a UV-ozone chamber for 15 minutes. PEDOT: PSS was precisely spin-coated onto the substrate for 20 seconds at 4000rpm, and subsequently, it was subjected to a 150°C bake for 10 minutes before being transferred to a nitrogen-filled glove box for subsequent processing. The substrates were then transferred into a nitrogen-filled glove box. The PM6:Y6, PM6:eC9, PM6:N3 concentration was 16.4 mg/ml chloroform solution with D:A ratio of 1:1.2 (w/w) and PDCI 6 mg/mL in CF containing 0.4% (v / v) solvent additive (CB, PDC). The solution was stirred at room temperature for 2 hours, following which the mixed solution was spin-coated onto the upper layer of PEDOT: PSS. Subsequently, PFN-Br was spin-coated at 3000rpm in an isopropanol solution for 30 seconds. Finally, in the thermal evaporator, transferred from the substrate, the Ag electrode was evaporated at a pressure of  $2 \times 10^{-5}$ Pa.

The EQE measurements of organic solar cells were performed by Stanford Systems model SR830 DSP lock-in amplifier coupled with WDG3 mono-chromator and 500 W xenon lamp. A calibrated silicon detector was used to determine the absolute photosensitivity at different wavelengths. The  $J$ - $V$  curves were measured under AM 1.5 G (100 mW/cm<sup>2</sup>) (Enli Technology Co., Ltd. SS-X50R).

### **3. Density Functional Theory Computation**

The molecular geometry optimizations of Y6 and two additives are performed by Gaussian 16 at B3LYP/6-31G\* level, where the long alkyl side chains are simplified to methyl groups to save computational cost. Conformational searches of the complex (Y6 and additives) are performed to find the low-energy conformers. 500 conformers are generated and optimized by semi-empirical extended tight-binding method GFN2-xTB as implemented in xtb program. The conformers with the lowest energy are further optimized by Gaussian 16, where the 6-311G\*\* basis set in conjunction with the D3BJ dispersion correction are used to calculate Gibbs free energy. The binding energy is determined by  $\Delta E_b = E_{com} - (E_{M1} + E_{M2})$ , where  $E_{M1}$ ,  $E_{M2}$  and  $E_{com}$  are the Gibbs free energy of molecule 1, molecule 2 and their complex.

### **4. Atomic force microscopy (AFM)**

Topographic images of the films were acquired through a Bruker atomic force microscopy (AFM), employing the Dimension Edge system equipped with Scan AsystTM, operating in tapping mode. This process utilized an etched silicon cantilever under a nominal load of approximately 2nN. The scanning rate for an image size of 2  $\mu\text{m} \times 2 \mu\text{m}$  was set at 1.5 Hz.

### **5. GIWAXS/GISAXS**

GIWAXS measurements were carried out with a Xeuss 2.0 SAXS laboratory beamline using a Cu X-ray source (8.05 keV, 1.54 Å) and a Pilatus3R 300K detector. The incidence angle is 0.2°.

GISAXS measurements were carried out with a Xeuss 2.0 SAXS laboratory beamline using a Cu X-ray source (8.05 keV, 1.54 Å) and a Pilatus3R 300K detector. The incidence angle is 0.2°.

## **6.Space-charge-limited current (SCLC)**

The carrier mobility (hole and electron mobility) of photoactive layer was determined by fitting the dark current of hole/electron-only diodes to the space-charge-limited current (SCLC) model. Hole-only diode configuration: Glass/ITO/PEDOT:PSS/active layer/MoO<sub>3</sub>/Ag; Electron-only diode configuration: Glass/ITO/ZnO/PFN-Br/active layer/PFN-Br/Ag.  $V_{bi} = 0$  was used for both fittings. The active layer thickness was determined by a Tencor surface profilometer. The electric-field dependent SCLC mobility was estimated using the following equation:

$$J(V) = \frac{9}{8} e_0 e_r m_0 \exp\left(0.89b \sqrt{\frac{V - V_{bi}}{L}}\right) \frac{(V - V_{bi})^2}{L^3}$$

## Supplementary Figures

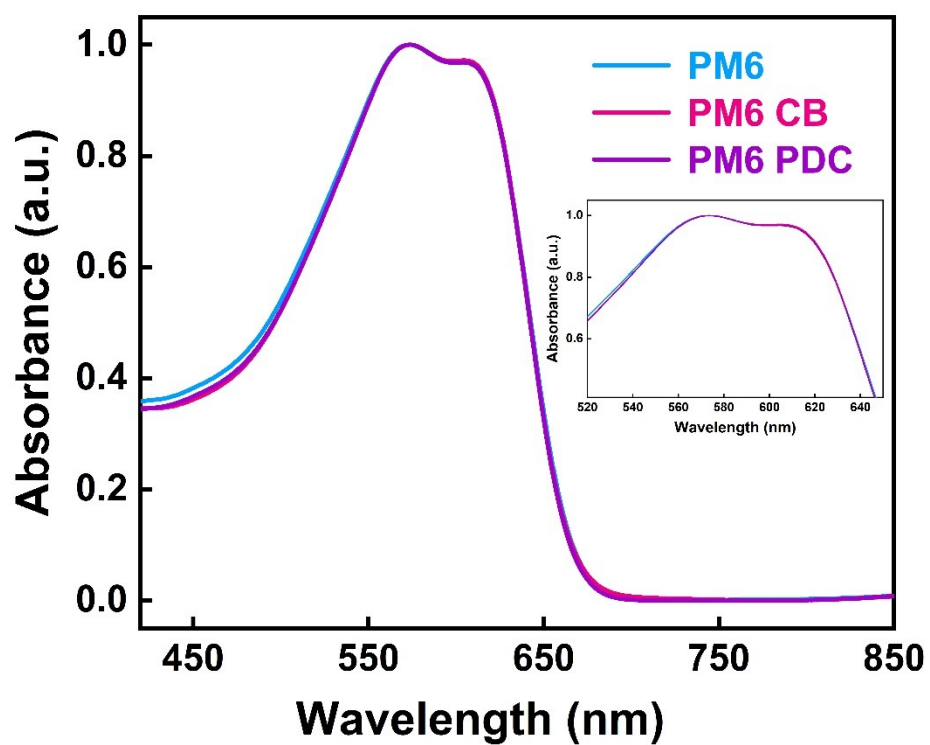

**Figure S1.** UV-vis absorption of Y6 film without and with CB, PDC solvent additives.

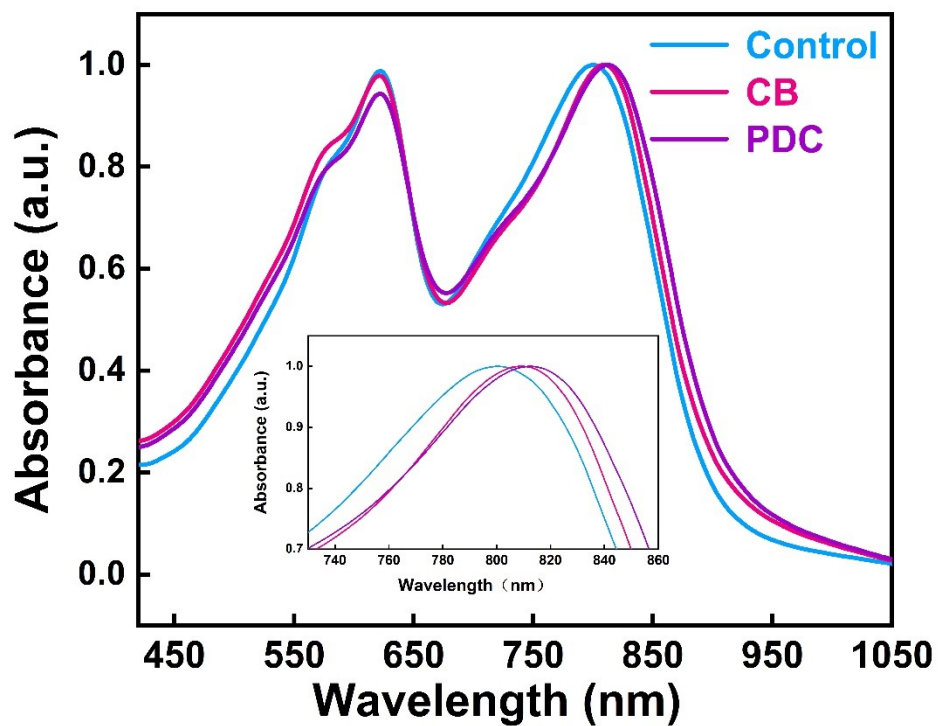

**Figure S2.** UV-vis absorption of PM6:Y6 film without and with CB, PDC solvent additives.

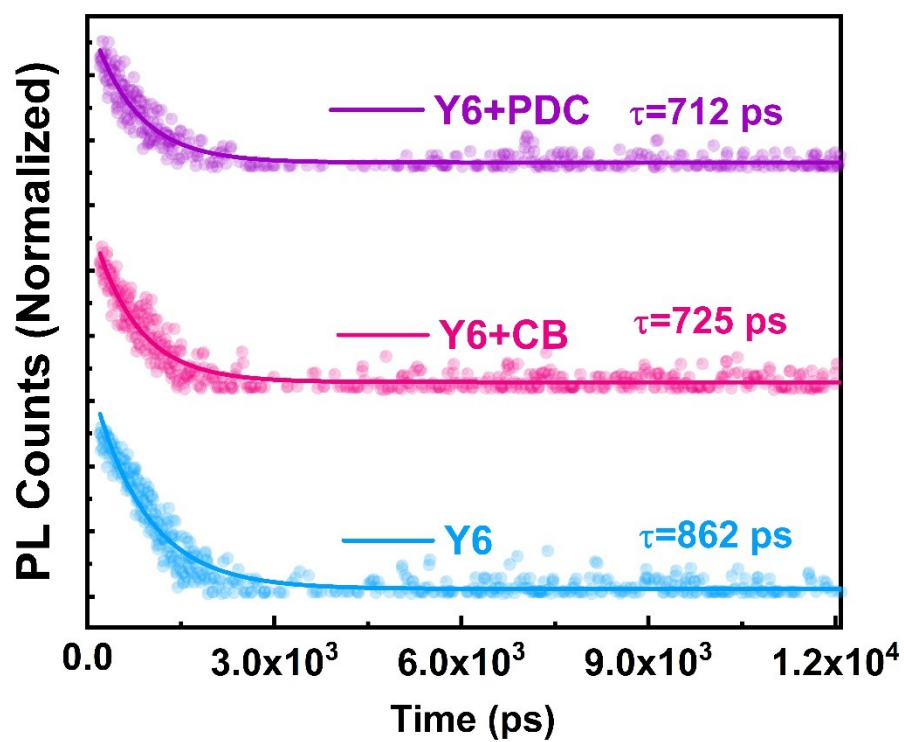

**Figure S3.** TRPL kinetics of Y6 and fits to the experimental data using a bi-exponential decay (solid line).

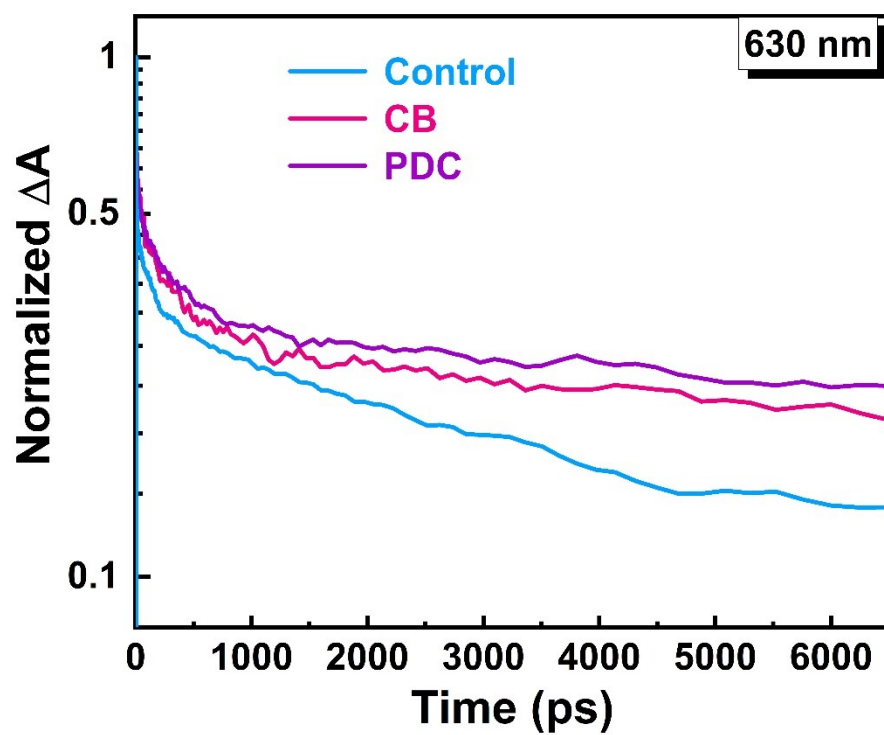

Figure S4. Carrier transfer kinetics analysis of 630nm.



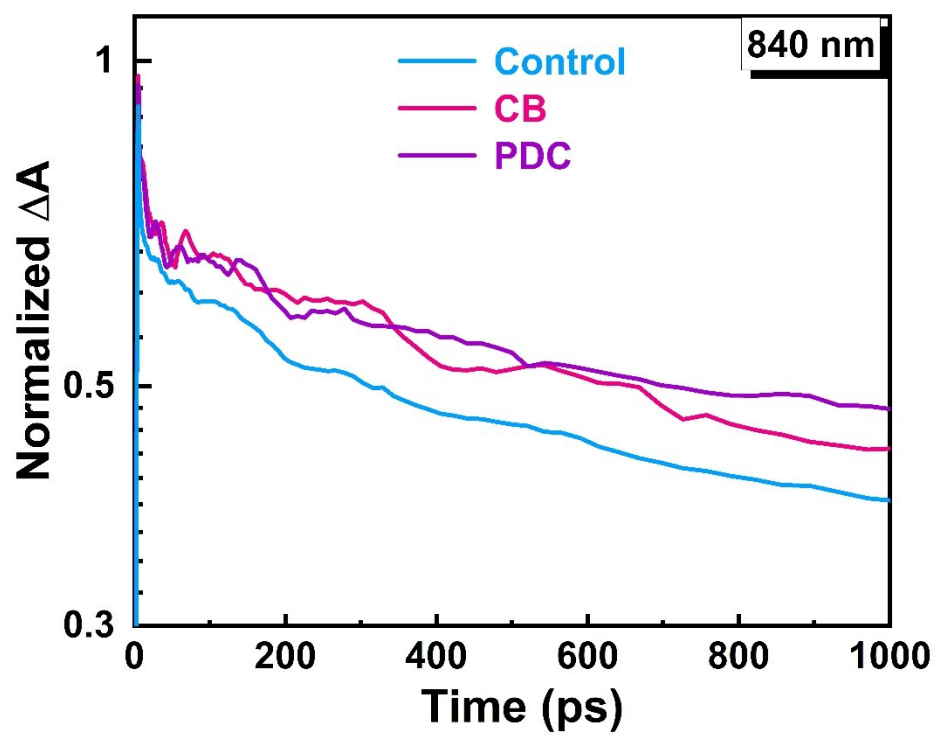

Figure S5. Carrier transfer kinetics analysis of 840 nm.

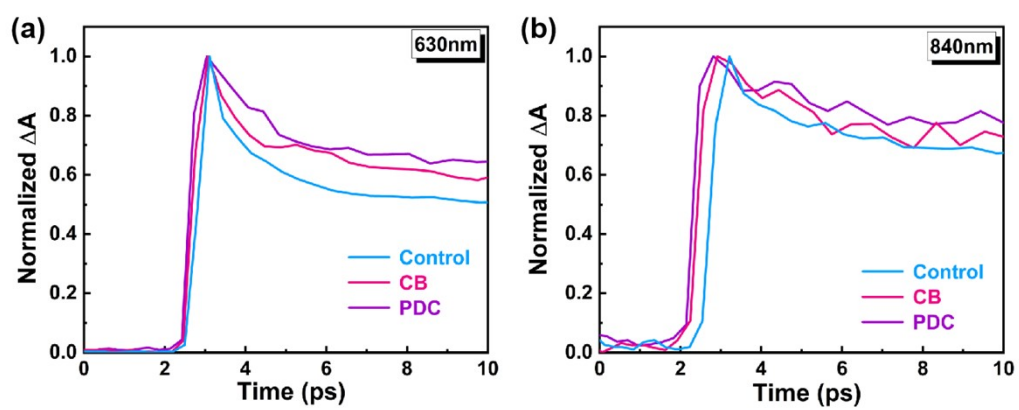

**Figure S6.** Free charge recombination analysis of a) 630nm and b)840nm

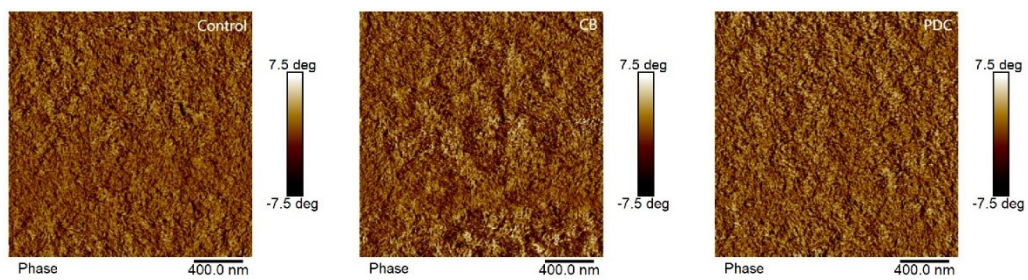

**Figure S7.** AFM phase images with the x-axis and y-axis scales of 2  $\mu\text{m}$  of PM6:Y6 blend films processed without/with different additives.

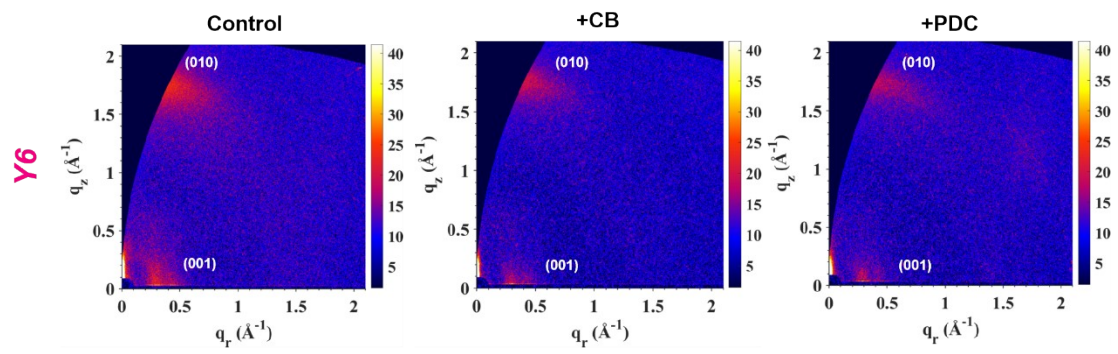

**Figure S8.** Y6 films without/with different additive processes.

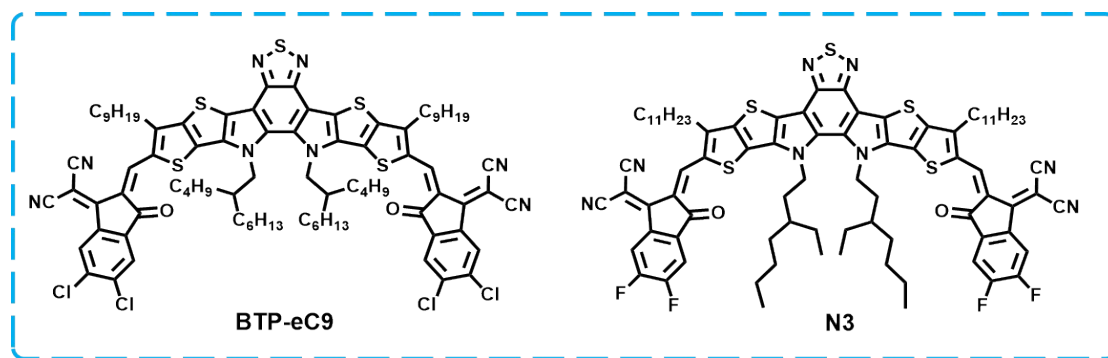

**Figure S9.** Chemical structure of BTP-eC9 and N3.

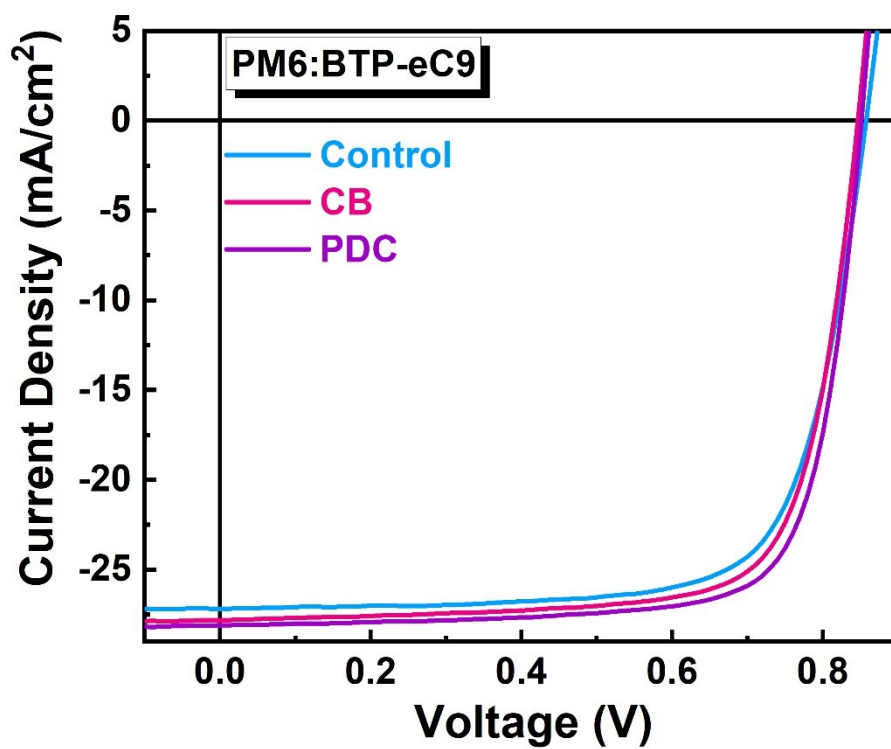

Figure S10. *J*-*V* of PM6:BTP-eC9 film without and with CB, PDC solvent additives.

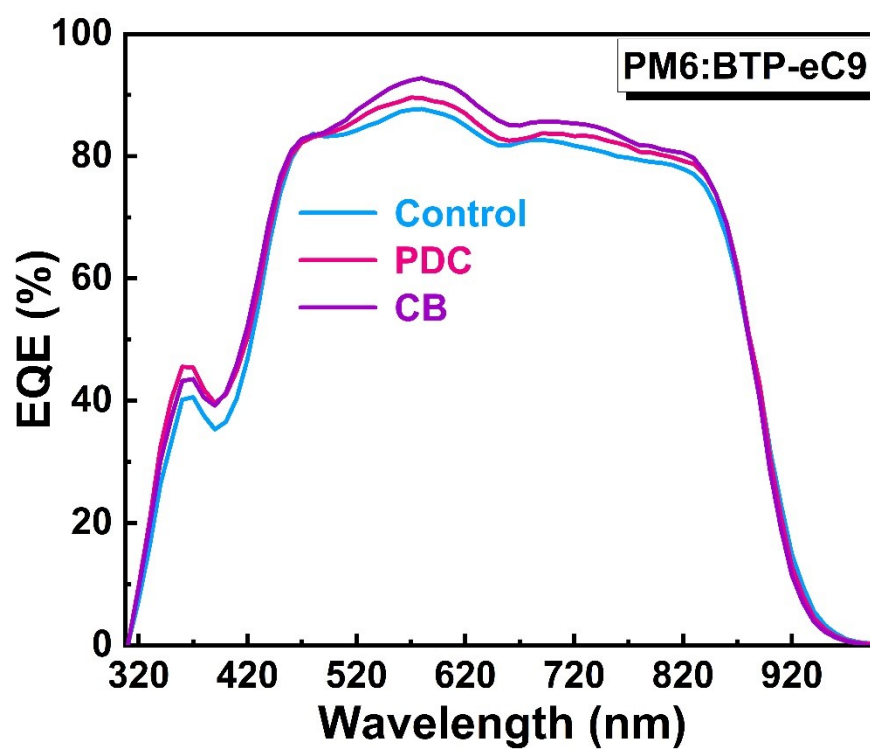

Figure S11. EQE of PM6:BTP-eC9 film without and with CB, PDC solvent additives.

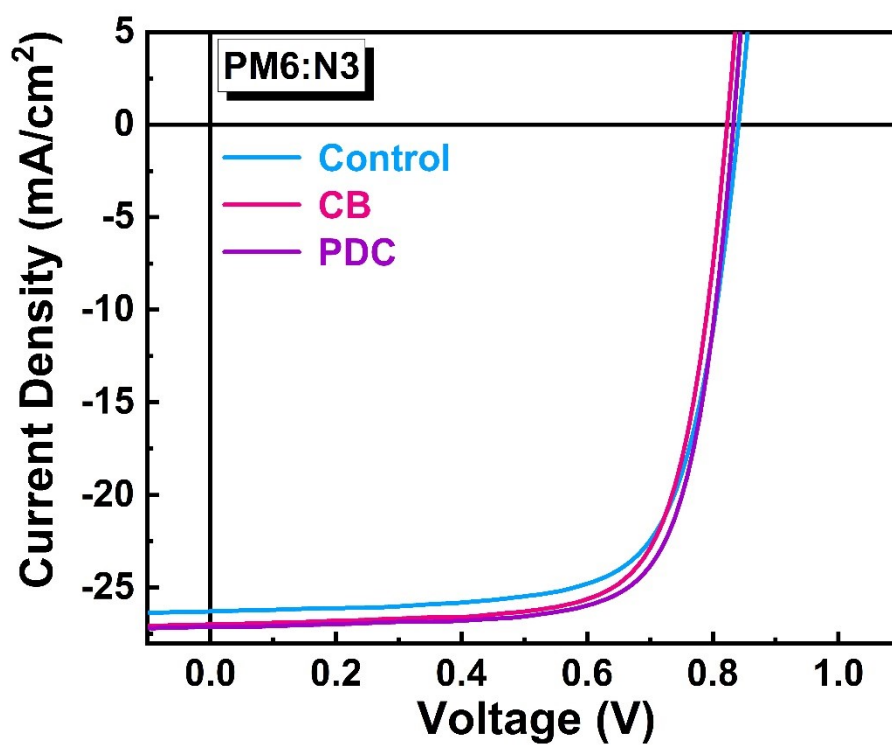

Figure S12. *J-V* of PM6:N3 film without and with CB, PDC solvent additives.



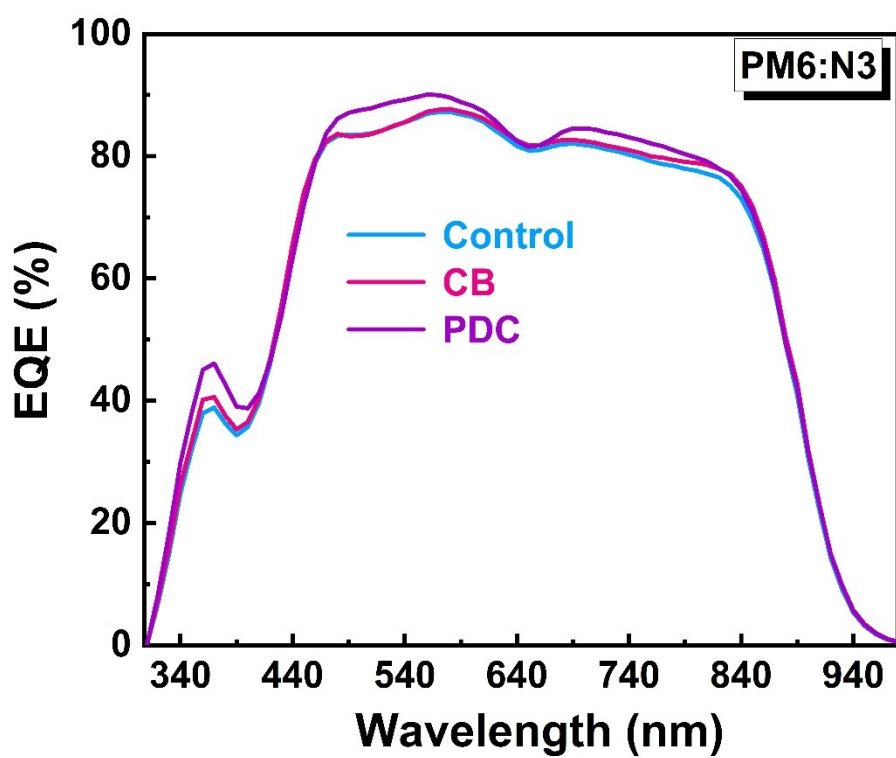

Figure S13. EQE of PM6:N3 film without and with CB, PDC solvent additives.

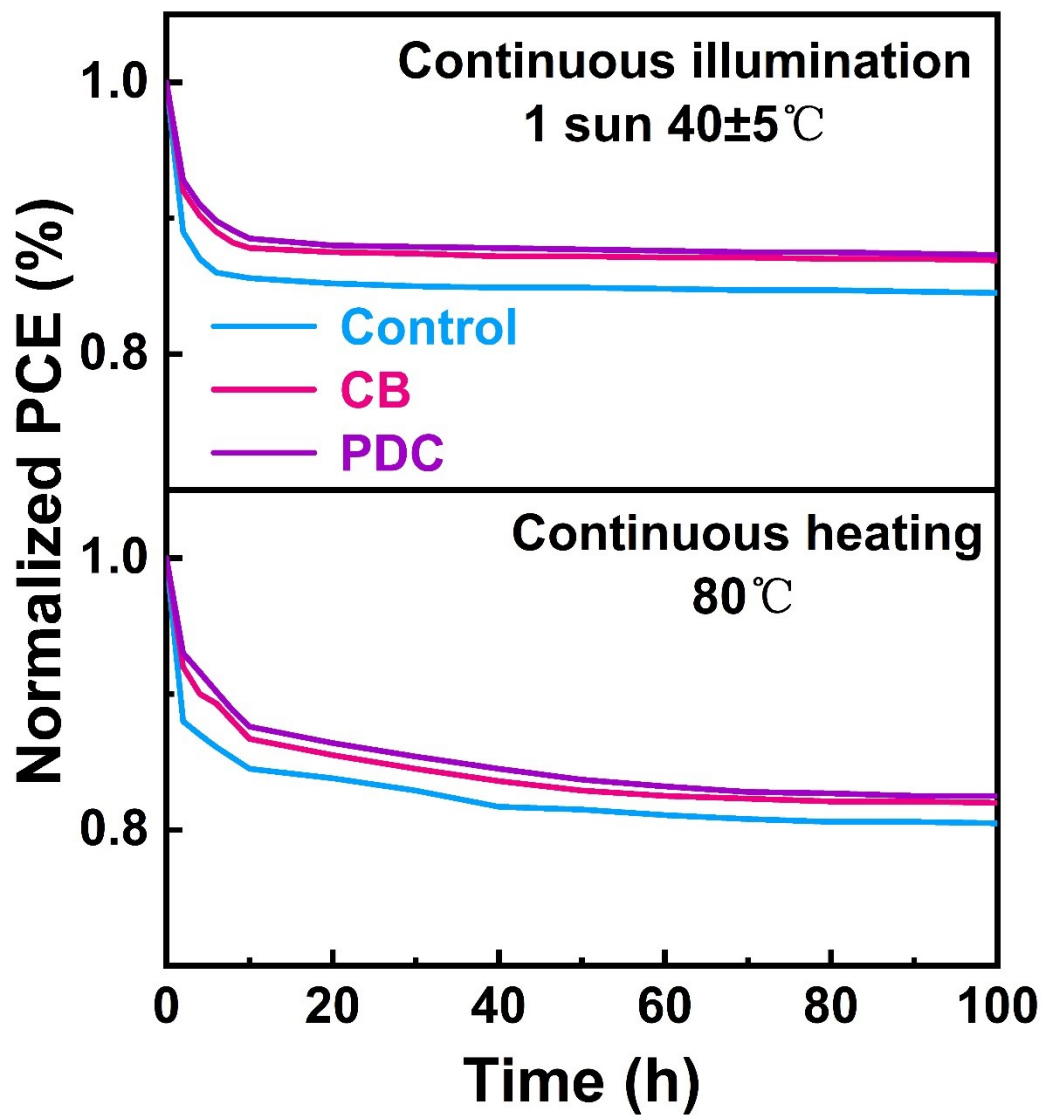

**Figure S14.** The stability of control, CB and PDC-treated devices under continuous heating at 80°C and 1 sun illumination.

## Supplementary Tables

**Table S1.** Summary of photovoltaic operating parameters for different OSCs.

| Device Condition | $V_{oc}$ (mV) | $J_{sc}$<br>(mA/cm <sup>2</sup> ) | $J_{EQE}$ (mA/cm <sup>2</sup> ) <sup>a)</sup> | $FF$ (%) | $PCE$ (%) <sup>b)</sup> |
|------------------|---------------|-----------------------------------|-----------------------------------------------|----------|-------------------------|
| PM6:eC9, control | 857.4         | 27.17                             | 25.98                                         | 72.93    | 16.99 (16.72±0.23)      |
| PM6:eC9, CB      | 846.3         | 27.80                             | 26.48                                         | 74.72    | 17.58 (17.38±0.21)      |
| PM6:eC9, PDC     | 851.1         | 28.09                             | 26.93                                         | 76.27    | 18.24 (18.01±0.18)      |
| PM6:N3, control  | 841.3         | 26.28                             | 25.67                                         | 71.53    | 15.82 (15.64±0.19)      |
| PM6:N3, control  | 823.0         | 26.98                             | 26.16                                         | 73.09    | 16.23 (16.00±0.25)      |
| PM6:N3, PDC      | 832.9         | 27.11                             | 26.41                                         | 74.10    | 16.73 (16.43±0.17)      |

<sup>a)</sup> The integrated  $J_{EQE}$  values were calculated from the EQE spectra;

<sup>b)</sup> The average PCEs with standard deviation were calculated from at least 10 devices.

**Table S2.** Summary of exciton dissociation rate and exciton collection rate for control and optimized devices with Control, CB and PDC.

| $J$ (mA/cm <sup>2</sup> ) | Control | CB    | PDC   |
|---------------------------|---------|-------|-------|
| $J_{sc}$                  | 26.87   | 27.25 | 27.82 |
| $J_{sat}$                 | 27.44   | 27.60 | 28.15 |
| $J_{maxpower}$            | 24.00   | 24.78 | 25.61 |

**Table S3.** Electron and hole mobility of control, CB and PDC devices.

| BHJ      | $\mu_h$ ( $\times 10^{-4}$ cm <sup>2</sup> V <sup>-1</sup> s <sup>-1</sup> ) | $\mu_e$ ( $\times 10^{-4}$ cm <sup>2</sup> V <sup>-1</sup> s <sup>-1</sup> ) | $\mu_h/\mu_e$ |
|----------|------------------------------------------------------------------------------|------------------------------------------------------------------------------|---------------|
| Control  | 4.12                                                                         | 2.47                                                                         | 1.67          |
| With CB  | 7.39                                                                         | 6.39                                                                         | 1.16          |
| With PDC | 8.11                                                                         | 7.53                                                                         | 1.08          |

**Table S4.** Analysis data of the two-dimensional GIWAXS results in out-of-plane direction (OOP) of Y6.

| Pure film  | Lattice plane | Peak location ( $\text{\AA}^{-1}$ ) | d-spacing ( $\text{\AA}$ ) | Coherence length ( $\text{\AA}$ ) | CCL/d |
|------------|---------------|-------------------------------------|----------------------------|-----------------------------------|-------|
|            |               | $q_z$                               | $q_z$                      | $q_z$                             | $q_z$ |
| <b>Y6</b>  | 010           | 1.78                                | 3.54                       | 19.14                             | 5.41  |
| <b>CB</b>  | 010           | 1.800                               | 3.50                       | 20.50                             | 5.86  |
| <b>PDC</b> | 010           | 1.79                                | 3.51                       | 21.20                             | 6.04  |

**Table S5.** Analysis data of the two-dimensional GIWAXS results in out-of-plane direction (OOP) of PM6:Y6.

| Blend film        | Lattice plane | Peak location ( $\text{\AA}^{-1}$ ) | d-spacing ( $\text{\AA}$ ) | Coherence length ( $\text{\AA}$ ) | CCL/d |
|-------------------|---------------|-------------------------------------|----------------------------|-----------------------------------|-------|
|                   |               | $q_z$                               | $q_z$                      | $q_z$                             | $q_z$ |
| <b>PM6:Y6</b>     | 010           | 1.77                                | 3.55                       | 18.66                             | 5.26  |
| <b>PM6:Y6+CB</b>  | 010           | 1.76                                | 3.57                       | 19.28                             | 5.41  |
| <b>PM6:Y6+PDC</b> | 010           | 1.77                                | 3.54                       | 19.66                             | 5.55  |
